# Supplementary material
Source: publisher figshare collection journal article supplement (https://karger.figshare.com/articles/dataset/_/5122696)
Supplement: Supplementary file 1 [file 1]

Supplemental table 1. Homologous chromosomal regions in *Sorex granarius*, *Sorex araneus* and two specimens of *Sorex tundrensis*

| SGR<br>2n=36/37 | SAR<br>2n=20/21 | STUI<br>2n=35 | STUII*<br>2n=30/31 |
|-----------------|-----------------|---------------|--------------------|
| 1               | a               | 16+9          | 3                  |
| 2               | b               | 7+1q          | 11q+1q             |
| 3               | c               | 14p+10        | 10p+2q             |
| 4               | f               | 6pdist+5      | 9p+8               |
| 5               | g               | 4             | 7                  |
| 6               | h               | 11p+13        | 14+4q              |
| 7               | i               | 1p            | 1p                 |
| 8               | j               | 2pq           | 6pq                |
| 9               | k               | 3q            | 5q                 |
| 10              | l               | 12            | 2p                 |
| 11              | m               | 15            | 4p                 |
| 12              | n               | 3p            | 5p                 |
| 13              | o               | 6pq           | 9q                 |
| 14              | p               | 11q           | 13                 |
| 15              | q               | 2qdist        | 6qdist             |
| 16              | r               | 14q           | 10q                |
| 17              | tu              | 8             | 12                 |

\* G-banding data, Aniskin, 1987

Supplemental table 2. Homology of chromosomes and chromosome arms of two specimens of *Sorex tundrensis* with *Sorex granarius* and *Sorex araneus*

| STUI<br>2n=35 | STUII*<br>2n=30/31 | SAR<br>2n=20/21 | SGR<br>2n=36/37 |
|---------------|--------------------|-----------------|-----------------|
| 1             | 1                  | b'i             | 2'+7            |
| 2 (2a +2b)    | 6                  | j''q''          | 8''+15''        |
| 3             | 5                  | kn              | 9+12            |
| 4             | 7                  | g''             | 5''             |
| 5             | 8                  | f ' ''          | 4 ' ''          |
| 6             | 9                  | o''f '          | 13''+4 '        |
| 7             | 11                 | b ' ''          | 2 ' ''          |
| 8             | 12                 | tu              | 17              |
| 9             | 3dist              | a ' ''          | 1 ' ''          |
| 10            | 2q                 | c ' ''          | 3 ' ''          |
| 11            | 14+13              | ph '            | 14+6 '          |
| 12            | 2p                 | l''             | 10''            |
| 13            | 4q                 | h '             | 6 '             |
| 14            | 10                 | rc '            | 16+3'           |
| 15            | 4p                 | m               | 11              |
| 16            | 3prox              | a '             | 1'              |

\* G-banding data, Aniskin, 1987, “ ' ” designates part of chromosome and “ '' ” indicates the centromere shift

Supplemental table 3. *Sorex* karyotypes in designations of genus ancestral chromosomal elements

| Number of chromosome | <i>Sorex</i> karyotypes |                         |                       |                      |                  |                      |
|----------------------|-------------------------|-------------------------|-----------------------|----------------------|------------------|----------------------|
|                      | <i>S. granarius</i>     | <i>S. araneus</i> #     | <i>S. coronatus</i>   | <i>S. tundrensis</i> | <i>S. raddei</i> | <i>S. minutus</i>    |
| 1                    | <i>a1 a2 a3</i>         | <i>b1'' b2 b3 c1 c2</i> | <i>a1 a2 a3 f1 f2</i> | <i>b1* b2 b3 i</i>   | <i>b2 r j2</i>   | <i>g1 o</i>          |
| 2                    | <i>b1 b2 b3</i>         | <i>a1 a2 a3 f1 f2</i>   | <i>c1 c2 i</i>        | <i>j1 j2'' q''</i>   | <i>b1 b3</i>     | <i>d2 i*</i>         |
| 3                    | <i>c1 c2</i>            | <i>i k1 k2</i>          | <i>b1'' b2 b3</i>     | <i>k1 k2 n</i>       | <i>c2 d2''</i>   | <i>d1 b1</i>         |
| 4                    | <i>f1 f2</i>            | <i>g1 g2 o</i>          | <i>g1 g2 m</i>        | <i>g1'' g2</i>       | <i>i'' j1 q</i>  | <i>h l1</i>          |
| 5                    | <i>g1 g2</i>            | <i>j1 j2 l1 l2</i>      | <i>j1 j2'' n</i>      | <i>f2''</i>          | <i>a2* c1</i>    | <i>j2 n</i>          |
| 6                    | <i>h</i>                | <i>h n</i>              | <i>l1 l2 o</i>        | <i>f1 o''</i>        | <i>a2* n</i>     | <i>a1 f1</i>         |
| 7                    | <i>i</i>                | <i>m p</i>              | <i>k1 k2 q</i>        | <i>b1*''</i>         | <i>p tu</i>      | <i>k1</i>            |
| 8                    | <i>j1 j2</i>            | <i>q r</i>              | <i>p r</i>            | <i>tu</i>            | <i>a3 m</i>      | <i>c1 f2*''</i>      |
| 9                    | <i>k1 k2</i>            | <i>tu</i>               | <i>h''</i>            | <i>a2'' a3</i>       | <i>f2</i>        | <i>a2''</i>          |
| 10                   | <i>l1 l2</i>            |                         | <i>tu</i>             | <i>c1* c2</i>        | <i>a1 f1</i>     | <i>i* j1 q f2*''</i> |
| 11                   | <i>m</i>                |                         |                       | <i>h* p</i>          | <i>g1 o</i>      | <i>m p''</i>         |
| 12                   | <i>n</i>                |                         |                       | <i>l1 l2''</i>       | <i>k2 d1</i>     | <i>b2 r</i>          |
| 13                   | <i>o</i>                |                         |                       | <i>h*</i>            | <i>h l1</i>      | <i>b3</i>            |
| 14                   | <i>p</i>                |                         |                       | <i>c1* r</i>         | <i>l2</i>        | <i>c2</i>            |
| 15                   | <i>q</i>                |                         |                       | <i>m</i>             | <i>g2</i>        | <i>k2</i>            |
| 16                   | <i>r</i>                |                         |                       | <i>a1</i>            | <i>k1</i>        | <i>l2</i>            |
| 17                   | <i>tu</i>               |                         |                       |                      | -                | <i>tu</i>            |
| 18                   |                         |                         |                       |                      |                  | <i>a3</i>            |
| 19                   |                         |                         |                       |                      |                  | -                    |
| 20                   |                         |                         |                       |                      |                  | <i>g2</i>            |
| X                    | <i>d1 d2 e</i>          | <i>d1 d2 e</i>          | <i>d1 d2 e</i>        | <i>d1 d2 e</i>       | <i>X (e)</i>     | <i>X (e)</i>         |

# - Novosibirsk race, "\*" designates chromosome fission, "" indicates the centromere shift
